# Supplementary material for: Tracing of Di-Ethylhexyl Phthalate in the Tequila Production Process
Source: MDPI journal article supplement (doi:10.3390/foods13020334), 2024-01-20
Supplement: s1 [file s1]

**Table S1.** Percentage of DEHP recovered from agave and vinasses after the extraction with dichloromethane and analysis by GC/MS.

| Quantity (µg) | Agave (%) | Quantity (µg) | Vinasses (%) |
|---------------|-----------|---------------|--------------|
| 1.75          | 108.3     | 0.07          | 82.9         |
| 3.50          | 103.9     | 0.175         | 107.4        |
| 7.00          | 88.5      | 0.70          | 94.9         |
